# Supplementary material for: AEG‐1 induces gastric cancer metastasis by upregulation of eIF4E expression
Source: PubMed Central journal article supplement (PMC5706588; doi:10.1111/jcmm.13258), 2017-06-29
Supplement: JCMM-21-3481-s001.pdf [file JCMM-21-3481-s001.pdf]

## Supplementary Data 1

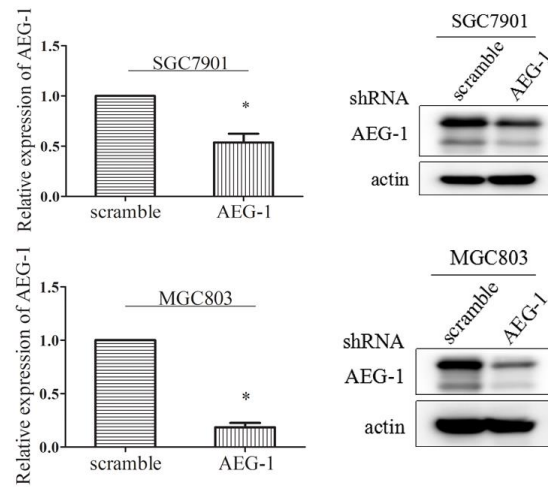

Supplementary Data 1. Stable cell lines with AEG-1 knockdown suppressed migration and invasion of gastric cancer cells. The mRNA and protein expression of AEG-1 in stable AEG-1 knockdown (AEG-1\_shRNA) SGC7901 and MGC803 cells or their control cells (scamble\_shRNA). Cells were cultured for 24h, and subjected to quantitative reverse transcriptional PCR and western blot assay. Columns, means of three replicates; bars, SD. \*,  $P < 0.05$ . The data are representatives of three independent experiments.

Supplementary Data 2.

Images and representative H&E staining of metastatic tumors in orthotopic nude mice

| Mouse number             | Representative images                                                               | Representative H&E staining (100×)                                                   |
|--------------------------|-------------------------------------------------------------------------------------|--------------------------------------------------------------------------------------|
|                          |                                                                                     | Number of metastatic nodules                                                         |
| Scramble_shRNA - mouse 1 |   |   |
|                          |                                                                                     | 15                                                                                   |
| Scramble_shRNA - mouse 2 |  |  |
|                          |                                                                                     | 18                                                                                   |

|                                 |                                                                                     |                                                                                      |           |
|---------------------------------|-------------------------------------------------------------------------------------|--------------------------------------------------------------------------------------|-----------|
| <p>Scramble_shRNA - mouse 3</p> |    |    | <p>21</p> |
| <p>Scramble_shRNA - mouse 4</p> |   |   | <p>13</p> |
| <p>Scramble_shRNA - mouse 5</p> |  |  | <p>16</p> |



|                                 |                                                                                     |                                                                                               |
|---------------------------------|-------------------------------------------------------------------------------------|-----------------------------------------------------------------------------------------------|
| <p>Scramble_shRNA - mouse 6</p> |    |  <p>72</p>  |
| <p>Scramble_shRNA - mouse 7</p> |   |  <p>9</p>  |
| <p>Scramble_shRNA - mouse 8</p> |  |  <p>9</p> |

|                                  |                                                                                     |                                                                                                |
|----------------------------------|-------------------------------------------------------------------------------------|------------------------------------------------------------------------------------------------|
| <p>Scramble_shRNA - mouse 9</p>  |    |  <p>17</p>   |
| <p>Scramble_shRNA - mouse 10</p> |   |  <p>11</p>  |
| <p>AEG-1_shRNA - mouse 1</p>     |  |  <p>11</p> |



|                              |                                                                                     |                                                                                               |
|------------------------------|-------------------------------------------------------------------------------------|-----------------------------------------------------------------------------------------------|
| <p>AEG-1_shRNA - mouse 2</p> | 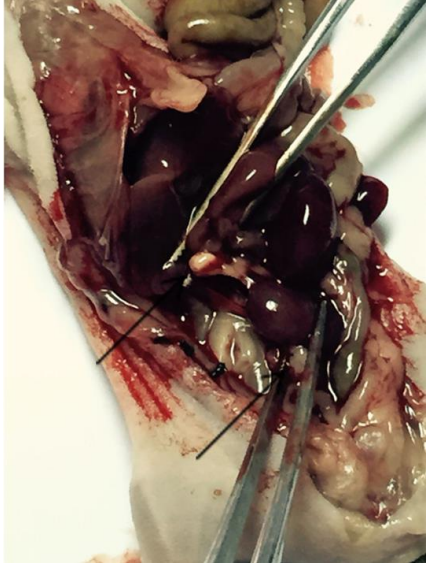   |  <p>3</p>   |
| <p>AEG-1_shRNA - mouse 3</p> |   |  <p>2</p>  |
| <p>AEG-1_shRNA - mouse 4</p> |  |  <p>8</p> |



|                              |                                                                                     |                                                                                               |
|------------------------------|-------------------------------------------------------------------------------------|-----------------------------------------------------------------------------------------------|
| <p>AEG-1_shRNA - mouse 5</p> |    |  <p>9</p>   |
| <p>AEG-1_shRNA - mouse 6</p> |   |  <p>3</p>  |
| <p>AEG-1_shRNA - mouse 7</p> |  |  <p>6</p> |



|                               |                                                                                     |                                                                                               |
|-------------------------------|-------------------------------------------------------------------------------------|-----------------------------------------------------------------------------------------------|
| <p>AEG-1_shRNA - mouse 8</p>  |    |  <p>2</p>   |
| <p>AEG-1_shRNA - mouse 9</p>  |   |  <p>2</p>  |
| <p>AEG-1_shRNA - mouse 10</p> |  |  <p>4</p> |
